# Supplementary material for: Natural SARS-CoV-2 Infection Affects Neutralizing Activity in Saliva of Vaccinees
Source: PubMed Central journal article supplement (PMC8962193; doi:10.3389/fimmu.2022.820250), 2022-03-11
Supplement: Table_1.pdf [file Table_1.pdf]

|    | subject | iFlash SARS-CoV-2 IgG and IgM (YHLO) |                             |
|----|---------|--------------------------------------|-----------------------------|
|    | N°      | Neg < 10 AU/mL Pos > 10 AU/m         | Neg < 10AU/mL Pos > 10AU/mL |
|    |         | IgG                                  | IgM                         |
| SV | 1       | 0.1                                  | 0.3                         |
|    | 2       | 0.2                                  | 0.3                         |
|    | 3       | 0.1                                  | 0.2                         |
|    | 4       | 0.1                                  | 0.2                         |
|    | 5       | 0.3                                  | 2.1                         |
|    | 6       | 0.5                                  | 0.1                         |
|    | 7       | 0.2                                  | 0.1                         |
|    | 8       | 0.2                                  | 0.3                         |
|    | 9       | 0.1                                  | 0.4                         |
|    | 10      | 0.1                                  | 0.9                         |
|    | 11      | 0.1                                  | 0.1                         |
|    | 12      | 0.3                                  | 0.1                         |
|    | 13      | 0.6                                  | 2.2                         |
|    | 14      | 0.7                                  | 0.2                         |
|    | 15      | 0.1                                  | 0.3                         |
|    | 16      | 0.1                                  | 0.9                         |
|    | 17      | 0.2                                  | 0.9                         |
|    | 18      | 0.2                                  | 0.3                         |
|    | 19      | 0.3                                  | 0.9                         |
|    | 20      | 0.9                                  | 2.1                         |
|    | 21      | 2.1                                  | 0.5                         |
|    | 22      | 0.5                                  | 0.5                         |
|    | 23      | 0.5                                  | 2.0                         |
|    | 24      | 2.0                                  | 0.8                         |
|    | 25      | 0.8                                  | 0.1                         |
|    | 26      | 0.1                                  | 0.6                         |
|    | 27      | 0.6                                  | 0.2                         |
|    | 28      | 0.2                                  | 0.3                         |
|    | 29      | 0.3                                  | 0.6                         |
|    | 30      | 0.5                                  | 0.4                         |
|    | 31      | 0.2                                  | 1.9                         |
|    | 32      | 0.3                                  | 2.1                         |

|     |    |      |     |
|-----|----|------|-----|
|     | 33 | 0.2  | 1.5 |
|     | 34 | 0.1  | 0.5 |
|     | 35 | 2.3  | 1.0 |
|     | 36 | 0.6  | 0.8 |
|     | 37 | 0.4  | 2.1 |
|     | 38 | 0.2  | 0.6 |
|     | 39 | 0.2  | 0.2 |
|     | 40 | 0.1  | 0.6 |
| IS  | 1  | 16.3 | 0.3 |
|     | 2  | 16.9 | 0.2 |
|     | 3  | 20.6 | 0.1 |
|     | 4  | 18.9 | 0.2 |
|     | 5  | 23.3 | 0.1 |
|     | 6  | 27.6 | 2.3 |
|     | 7  | 29.6 | 2.2 |
|     | 8  | 18.9 | 2.5 |
|     | 9  | 22.6 | 2.6 |
|     | 10 | 28.7 | 2.6 |
|     | 11 | 18.8 | 3.9 |
|     | 12 | 18.6 | 0.6 |
|     | 13 | 17.1 | 4.5 |
|     | 14 | 17.7 | 0.3 |
|     | 15 | 28.5 | 2.6 |
|     | 16 | 18.6 | 0.6 |
|     | 17 | 30.3 | 0.1 |
|     | 18 | 26.6 | 3.6 |
|     | 19 | 21.6 | 2.1 |
|     | 20 | 14.3 | 0.6 |
| SIV | 1  | 15.1 | 0.3 |
|     | 2  | 25.6 | 3.6 |
|     | 3  | 27.3 | 3.2 |
|     | 4  | 17.3 | 0.1 |
|     | 5  | 15.3 | 2.2 |
|     | 6  | 14.9 | 0.1 |
|     | 7  | 26.7 | 2.3 |

|  |    |      |     |
|--|----|------|-----|
|  | 8  | 12.3 | 2.2 |
|  | 9  | 15.1 | 2.5 |
|  | 10 | 20.6 | 2.6 |
|  | 11 | 22.9 | 2.6 |
|  | 12 | 29.8 | 0.9 |
|  | 13 | 22.4 | 0.6 |
|  | 14 | 16.3 | 4.5 |
|  | 15 | 15.2 | 0.3 |
|  | 16 | 21.6 | 1.6 |
|  | 17 | 27.3 | 0.6 |
|  | 18 | 20.0 | 0.1 |
|  | 19 | 21.3 | 4.6 |
|  | 20 | 22.6 | 2.1 |
|  | 21 | 23.9 | 0.5 |
|  | 22 | 22.2 | 6.3 |
|  | 23 | 29.9 | 1.3 |
|  | 24 | 21.6 | 2.5 |
|  | 25 | 23.9 | 2.2 |
|  | 26 | 23.6 | 1.6 |
|  | 27 | 25.9 | 0.1 |
|  | 28 | 17.0 | 0.2 |
